# Supplementary material for: Highly stretchable, transparent and scalable elastomers with tunable dielectric permittivity
Source: Royal Society of Chemistry journal article supplement (doi:10.1039/c1jm10225g), 2011-01-01
Supplement: c1jm10225g.pdf [file c1jm10225g.pdf]

## Electronic Supplementary Information

### Highly stretchable, transparent and scalable elastomers with tunable dielectric permittivity

Sibdas Singha Mahapatra,<sup>a,b</sup> Santosh Kumar Yadav,<sup>a</sup> Hye Jin Yoo<sup>a</sup> and Jae Whan Cho<sup>a\*</sup>

<sup>a</sup>Department of Textile Engineering, Konkuk University 1 Hwayang-dong, Gwangjin-gu, Seoul 143-701, Korea.

<sup>b</sup>Present address: Department of Chemical Engineering, Imperial College London, South Kensington Campu, London SW7 2AZ, UK.

\*Corresponding author. Tel: +82-2-450-3513; Fax: +82-2-457-8895;

E-mail: jwcho@konkuk.ac.kr

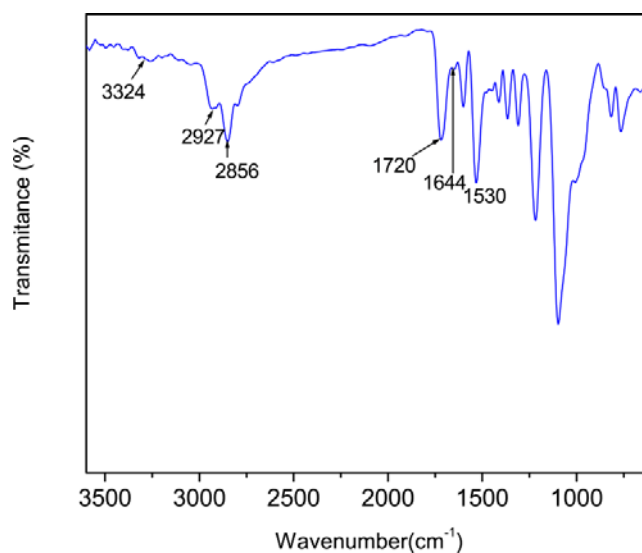

**Fig. S1** FT-IR spectra of hyperbranched polyurethane.

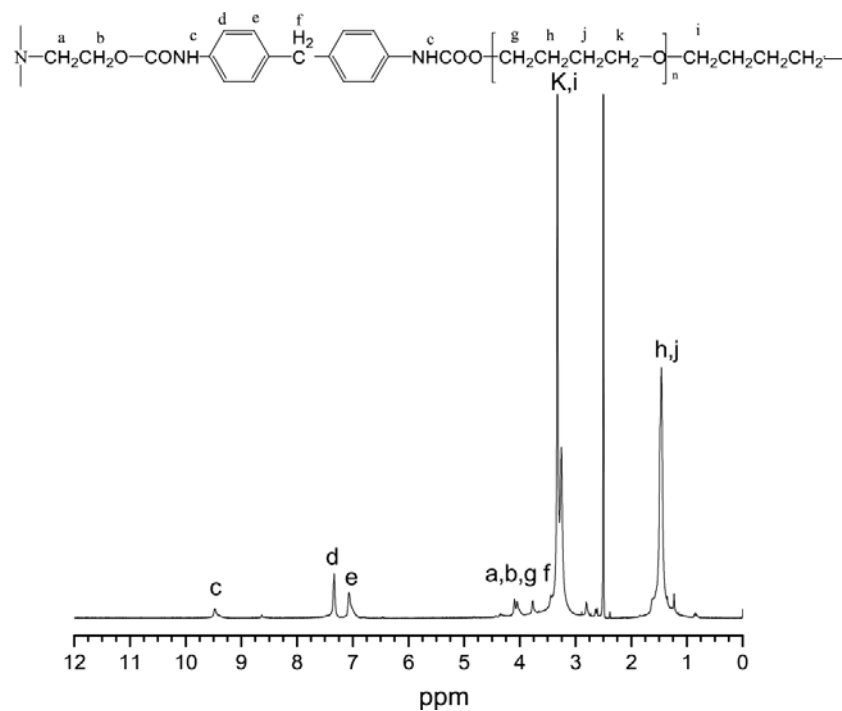

**Fig. S2** <sup>1</sup>H NMR spectra of hyperbranched polyurethane.

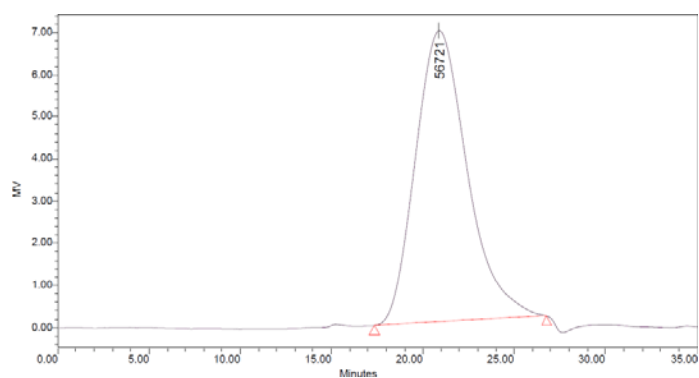

**Fig. S3** Gel permeation chromatography of hyperbranched polyurethane.

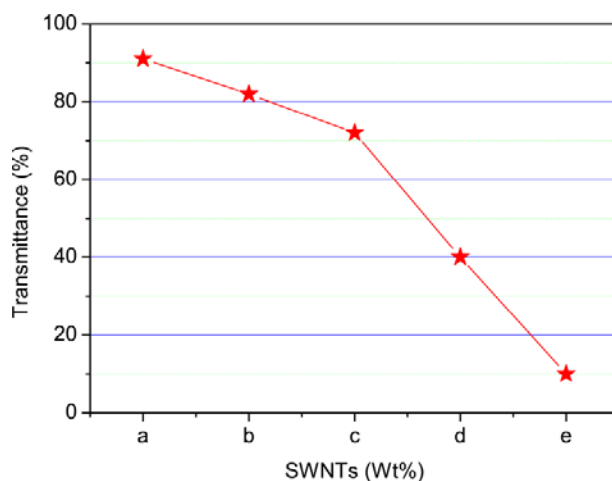

**Fig. S4** Transmittance at 800 nm of HPU/0.01% SWNT(a), HPU/0.1% SWNT (b), HPU/1% SWNT, (c) HPU/2% SWNT (d), HPU/4% SWNT (e) nanocomposites.

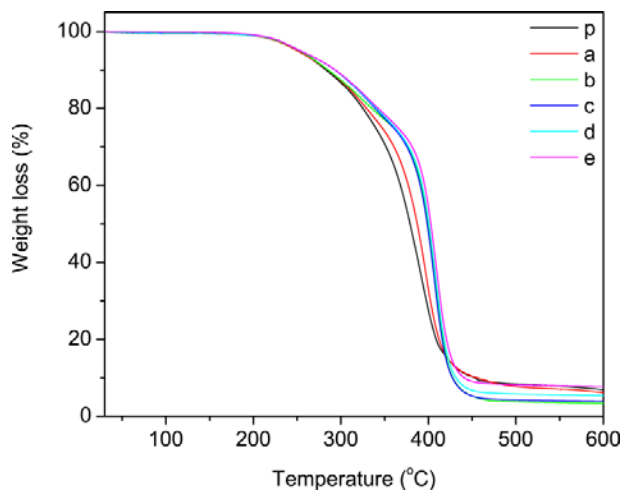

**Fig. S5** TGA thermogram of HPU/0.01% SWNT(a), HPU/0.1% SWNT (b), HPU/1% SWNT (c), HPU/2% SWNT (d), and HPU/4% SWNT (e) nanocomposites and pure HPU (P).
